# Supplementary material for: Controllable growth of metals on graphene nanosheets
Source: Royal Society of Chemistry journal article supplement (doi:10.1039/c3ra40244d), 2013-01-01
Supplement: c3ra40244d.pdf [file c3ra40244d.pdf]

## Electronic Supplementary Information

### Controllable growth of metals on graphene nanosheets

Shanshan Tao and Wenbo Yue

College of Chemistry, Beijing Normal University, Beijing 100875, P. R. China.

#### Experimental

The graphene oxides were synthesized by chemical exfoliation of natural graphite. In brief, 5 g of graphite powder (average size 20  $\mu\text{m}$ , apparent density  $0.05 \text{ g cm}^{-3}$ ) and 5 g of  $\text{NaNO}_3$  were added into 230 mL of 98%  $\text{H}_2\text{SO}_4$  under stirring in an ice bath. 30 g of  $\text{KMnO}_4$  was slowly added to the mixture under stirring for 15 min at below  $5^\circ\text{C}$ . The mixture was then heated at  $35^\circ\text{C}$  for 30 min. Subsequently, 460 ml of distilled water was slowly added into the above mixture, followed by stirring the mixture at  $98^\circ\text{C}$  for more than 15 min. The mixture was further diluted with 1400 mL of distilled water and the reaction was terminated by adding 25 mL of 30 %  $\text{H}_2\text{O}_2$ . Meanwhile, the color of the solution turned from dark brown to bright yellow. The resulting mixture was filtered and washed with distilled water several times to remove residual acids and salts. As-prepared GO was dispersed in water by ultrasonication for 30 min, followed by a low-speed centrifugation to get rid of any aggregated GO nanosheets.

The metal nanoparticles or layers functionalized graphene composites were synthesized through modified electroless plating. Firstly, 250mg of GO was suspended in 50 mL of deionized water and sonicated for 3 h in an ultrasonic bath. Then the suspension was transferred into a conical flask. 5mL of  $\text{K}_2\text{PdCl}_4$  (0.034g) solution was added into the GO suspension in an ice bath with vigorous stirring for 30 min. The resulting product was then collected by centrifugation and washed three times with deionized water. Subsequently, the as-synthesized product was added into 50 mL of electroless plating solution in a conical flask. The electroless Nickel plating solution contained 1.68 g of  $\text{NiCl}_2 \cdot 6\text{H}_2\text{O}$ , 2.5 g of  $\text{Na}_3\text{C}_6\text{H}_5\text{O}_7 \cdot 2\text{H}_2\text{O}$ , 1.68 g of  $\text{NH}_4\text{Cl}$  and 0.44 g of  $\text{NaH}_2\text{PO}_2 \cdot \text{H}_2\text{O}$ . The electroless Cobalt plating solution contained 1.19 g of  $\text{CoCl}_2 \cdot 6\text{H}_2\text{O}$ , 8.82 g of  $\text{Na}_3\text{C}_6\text{H}_5\text{O}_7 \cdot 2\text{H}_2\text{O}$ , 2.67 g of  $\text{NH}_4\text{Cl}$  and 2.65 g of  $\text{NaH}_2\text{PO}_2 \cdot \text{H}_2\text{O}$ . The pH of the electroless plating solution was then adjusted to 8~10 by the dilute ammonia water. The mixture solution was heated at  $70\sim 80^\circ\text{C}$  with stirring under  $\text{N}_2$  protection for 20~100 min. The final product was collected by centrifugation, washed with deionized water three times and dried at  $50^\circ\text{C}$  in the oven.

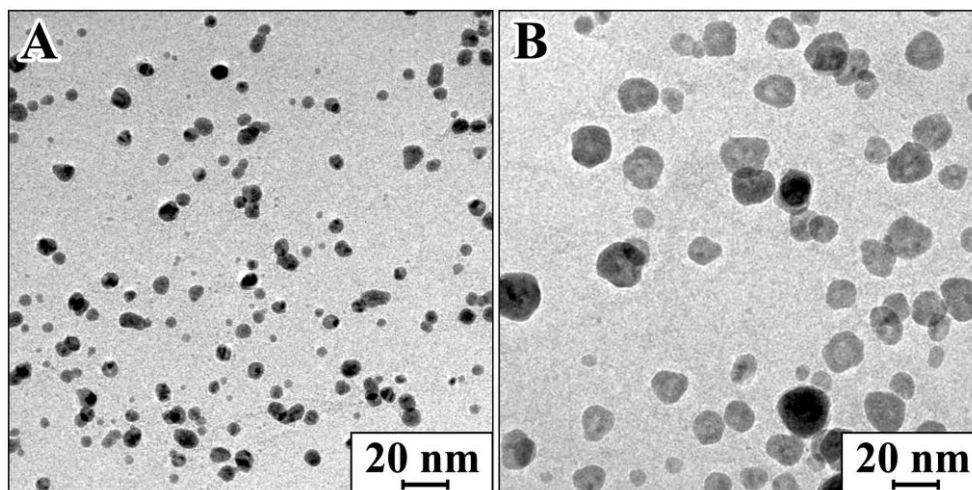

**Fig. S1** TEM images of (A) GO-Pd and (B) G-Ni20-L.

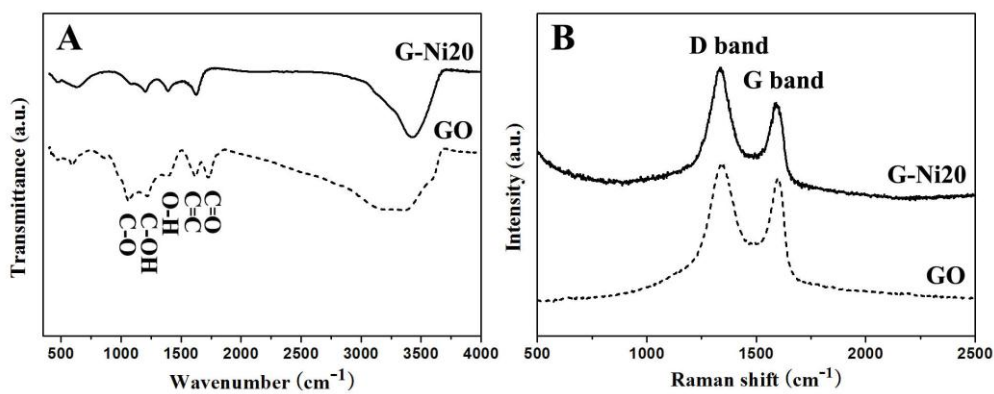

**Fig. S2** (A) FT-IR and (B) Raman spectra of GO and G-Ni20.

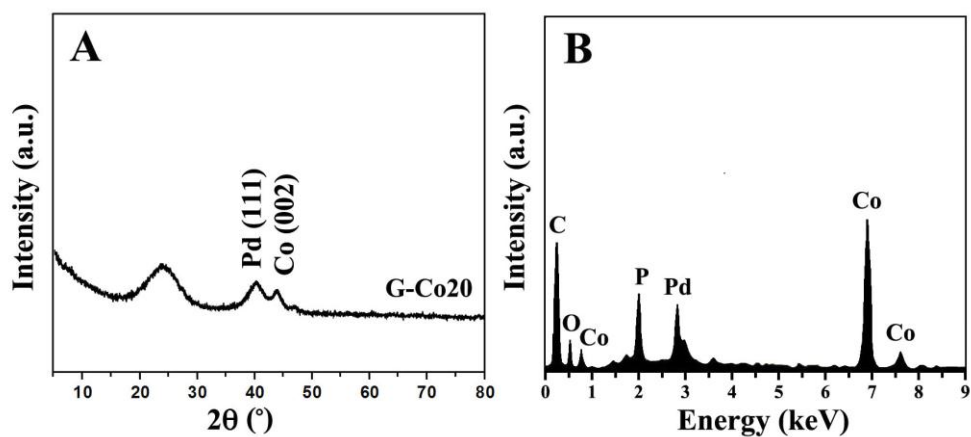

**Fig. S3** (A) XRD pattern and (B) EDX spectrum of G-Co20.

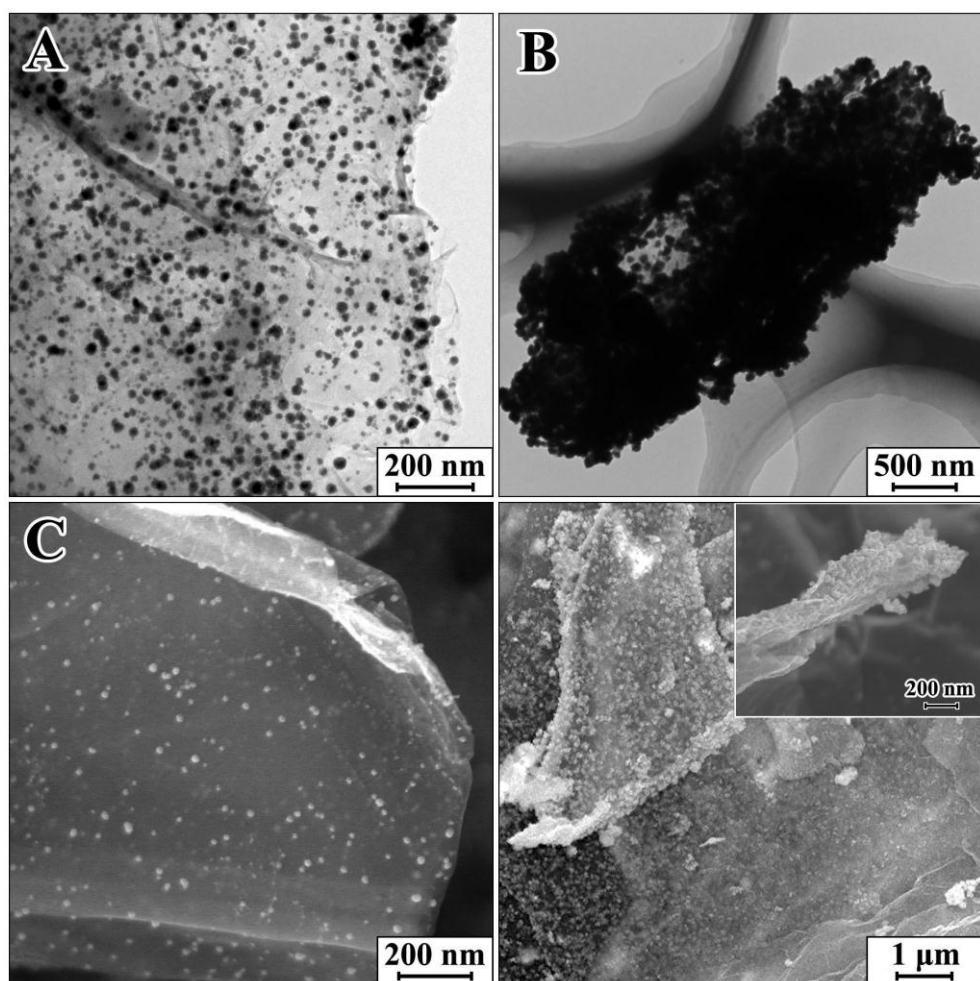

**Fig. S4** TEM and SEM images of (A, C) G-Co20 and (B, D) G-Co100, respectively. The inset of (D) is the cross-section of G-Co100.
